# Supplementary material
Source: PubMed Central journal article supplement (PMC1544175)
Supplement: pnas_0604246103_1.pdf [file pnas_0604246103_1.pdf]

**Table 2. Primer list**

| No | Forward Primer   | 5'-sequence-3'                              | Reverse Primer   | 5'-sequence-3'                                          |
|----|------------------|---------------------------------------------|------------------|---------------------------------------------------------|
| 1  | In3GGT-FW        | GAAATGGTCGGATTGGCTGGG                       | In3GGT-RV        | ACCTCCACCCCAACTTTCAGG                                   |
| 2  | Ph3GT-FW         | GATGCATAATTTGGCTAGAAAAGC                    | Ph3GT-RV         | CCAATTTGCCAAACACTTTCC                                   |
| 3  | Vh5GT-FW         | TGCCTCGAATGGTTGAGCACG                       | Vh5GT-RV         | CTCTCACTCTCACACCCG                                      |
| 4  | Sb7GT-FW         | CACGAATGCTTAGCATGGCTC                       | Sb7GT-RV         | CTTATTGCCCACTGAAACCCC                                   |
| 5  | Gt3'GT-FW        | TGTCTGAATTGGCTTGATTCC                       | Gt3'GT-RV        | AACCCACAGAAACCCTGTTC                                    |
| 6  | AmCHS-FW         | GGCGGAAAACAATGCC                            | AmCHS-RV         | CCAATATGACTCACAT                                        |
| 7  | AmCHI-FW         | GGGGATCCATGGCTGAGATCACCC<br>AAATTCAGGTCGAAT | AmCHI-RV         | GAAAGGTACCTCGAGTCACATCCTAGTTGTG<br>TTCTCTACTTTACATGGTTT |
| 8  | AmUGT12-FW       | ATGGGAGAAGAATACAAGAAAAC                     | AmUGT12-RV       | TCTTACGATAAAACAACTCA                                    |
| 9  | AmAS-FW          | AATTATTTCCCAATGTTCAAAAAT                    | AmAS-RV          | TGGAGCTTTAGGTTTGTGAAA                                   |
| 10 | AmDFR-FW         | ACTCTAATTATGAGTCCCACTTCA                    | AmDFR-RV         | AACCAACAATTTCTAGATTCT                                   |
| 11 | Am3GT-FW         | GTTCTAATCCTTAATCTAAC                        | Am3GT-RV         | CCGAGTTCACCCGCACTGCG                                    |
| 12 | AmGAPDH-FW       | TGTTGCTGTTAACGATCCAT                        | AmGAPDH-RV       | AGCTCTTCCACCTCTCCA                                      |
| 13 | ThF3H-FW         | TATGGCACGAGCAGGACCACTAAC                    | ThF3H-RV         | CGCCGTGTCGACTCG                                         |
| 14 | ThDFR-FW         | TAAGTATGAGCATGGAAGTA                        | ThDFR-RV         | GGTATGTCCTTGTC AATT                                     |
| 15 | ThGAPDH-FW       | GATGAGAAGACCCTTCTGTTT                       | ThGAPDH-RV       | CGACACAAGCTTCACAAACGTCTT                                |
| 16 | NcoI-AmUGT12-FW  | TCCATGGGAGAAGAATACAAGAAA<br>CA              | KpnI-AmUGT12-RV  | TGGTACCTAAAATTTGGTAGTTAAACCGATG<br>TA                   |
| 17 | ThDFR-NcoI-FW    | CCTTTACCATGGAGTAATGAGCTT                    |                  |                                                         |
| 18 | ThF3H-SalI-1     | TTCTCTGTCGACGCCATTGCA                       |                  |                                                         |
| 19 | ThF3H-SalI-2     | CGCCGTGTCGACTCGCTTGAAG                      |                  |                                                         |
| 20 | SalI-Am4'CGT-FW  | TTTGTGACATGGGAGAAGAATACA<br>AGAAA           | Nco-Am4'CGT-RV   | CACCATGGACAGAGTGACCGAGTTGATGAA<br>CTTCTCAAAGA           |
| 21 | Am4'CGT-probe-FW | ATGGGAGAAGAATACAAGAAAAC                     | Am4'CGT-probe-RV | TCTTACGATAAAACAACTCA                                    |
| 22 | AmAS-probe-FW    | AATTATTTCCCAATGTTCAAAAAT                    | AmAS-probe-RV    | TGGAGCTTTAGGTTTGTGAAA                                   |
